# Supplementary material for: Structural uncertainty in the direct human forcing of future global burned area
Source: Copernicus journal article supplement (doi:10.5194/egusphere-2025-3728), 2025-08-18
Supplement: Supplementary file 1 [file egusphere-2025-3728-supplement.pdf]

## Supplement to: *Structural uncertainty in the direct human forcing of global burned area*

### Contents:

1. Supplementary Figures: S1-S4
2. Supplementary Table S1

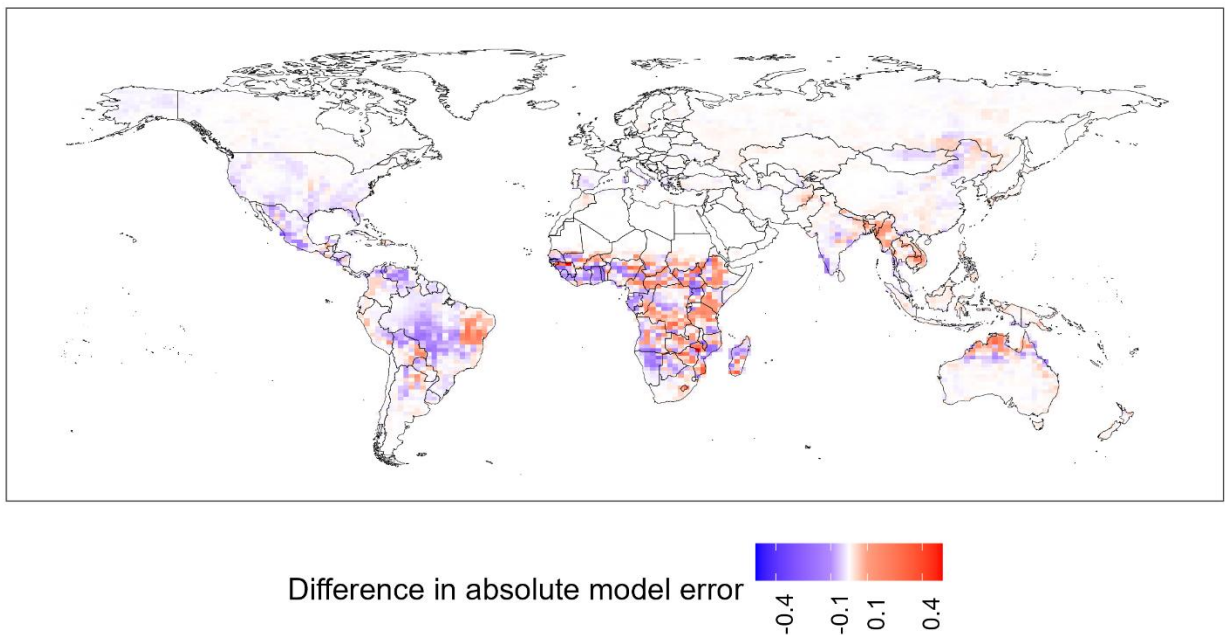

**Figure S1:** Difference in absolute model error between WHAM-INFERNO and the Haas model. Negative (blue) values indicate lower model error in WHAM-INFERNO and vice versa.

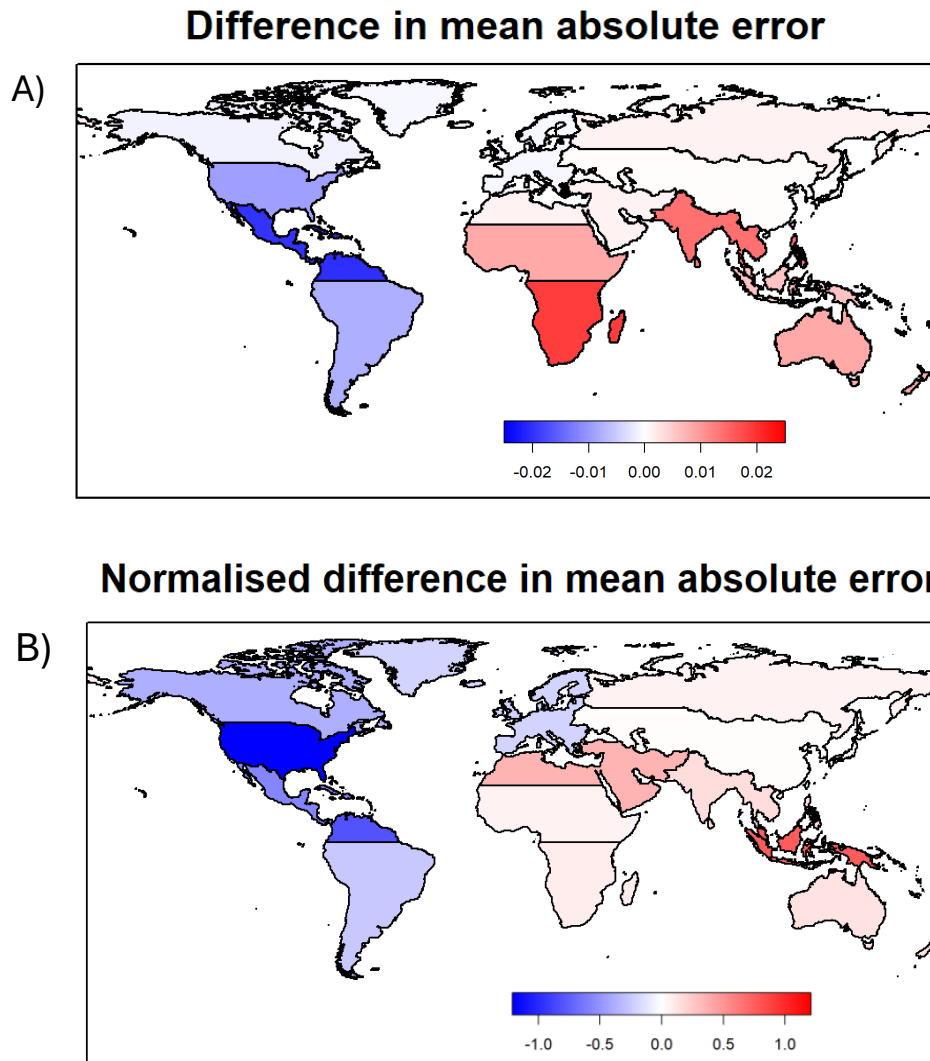

**Figure S2:** Difference in absolute error between WHAM-INFERNO and the Haas model. A) Difference in error, B) difference normalized by GFED5 burned area. Negative (blue) values indicate lower model error in WHAM-INFERNO and positive (red) values indicate lower model error in the Haas model.

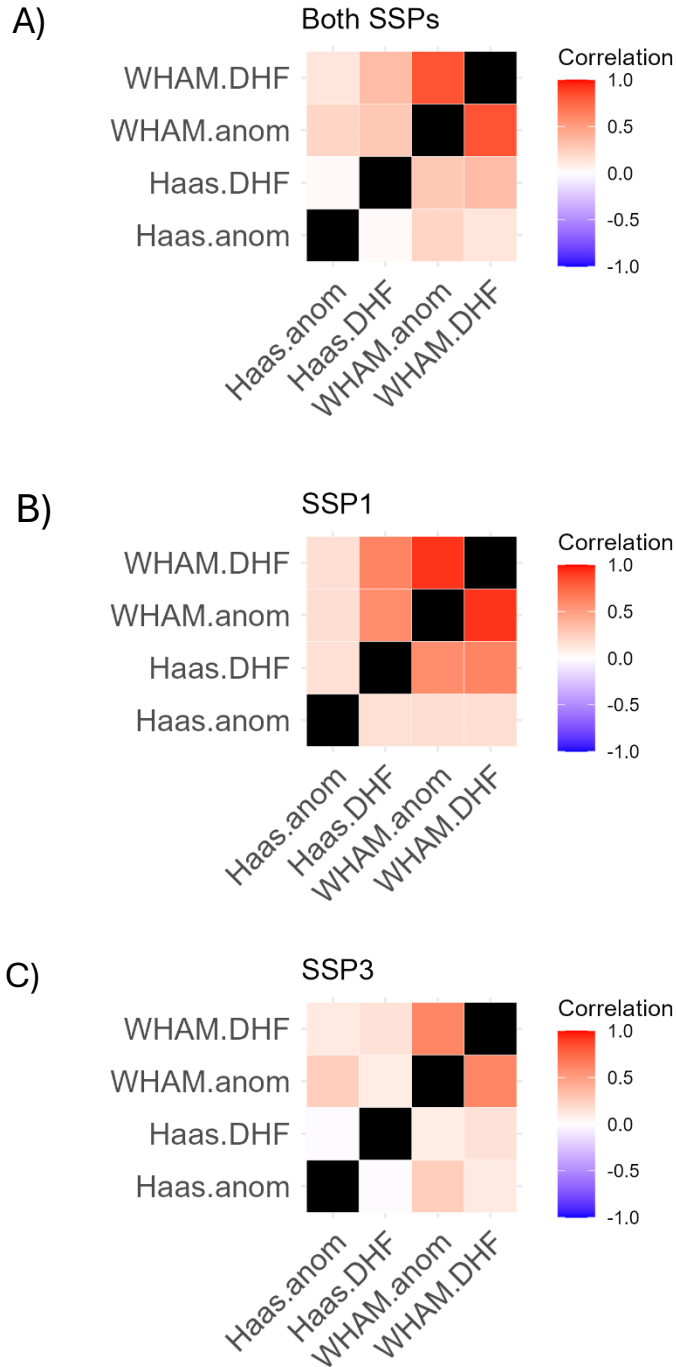

**Figure S3:** Pearson's correlation coefficient ( $r$ ) between model change (2020-2100; "anom") and model assessment of the direct human forcing of burned area ("DHF"). DHF was calculated as the difference between model runs where socio-economic inputs were held constant at 2020 levels and baseline scenario runs with all variables updated at each timestep. A) SSP1 & SSP3; B) SSP1; C) SSP3.

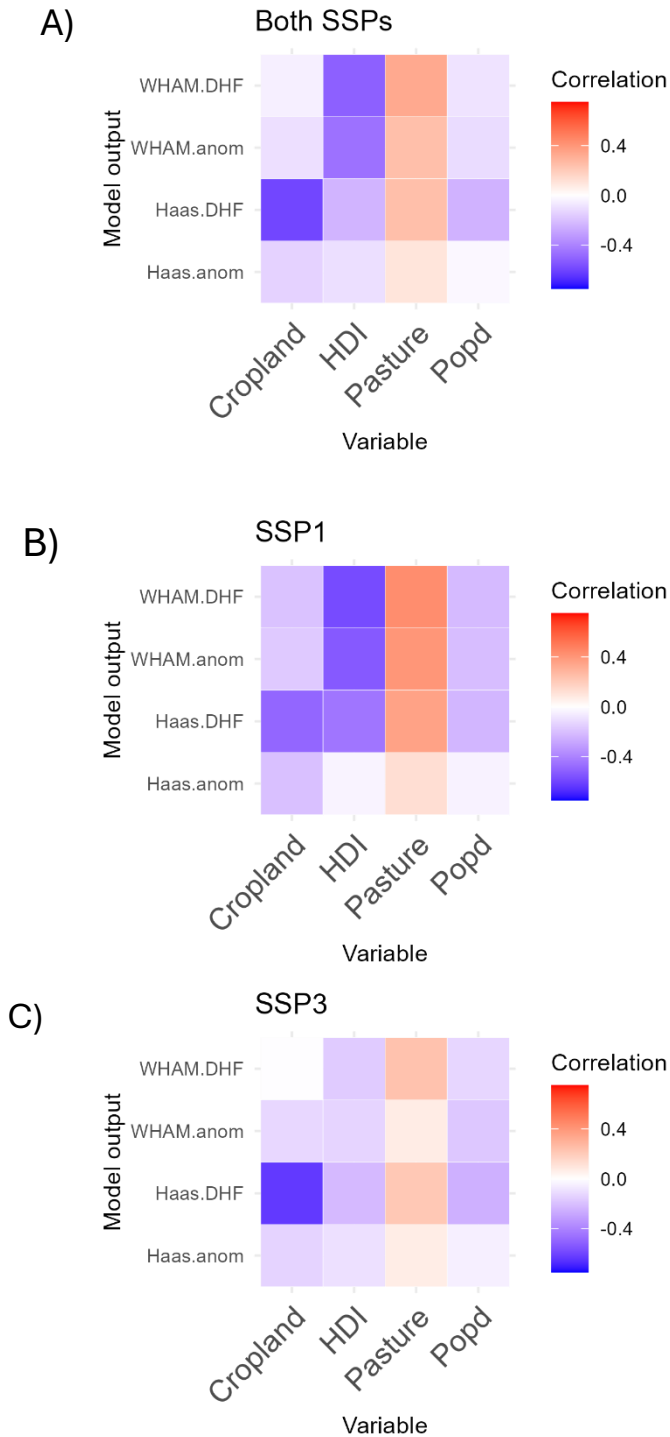

**Figure S4:** Pearson's correlation coefficient ( $r$ ) between socio-economic input variables, model change (2020-2100; "anom") and model assessment of the direct human forcing of burned area ("DHF"). DHF was calculated as the difference between model runs where socio-economic inputs were held constant at 2020 levels and baseline scenario runs with all variables updated at each timestep. A) SSP1 & SSP3; B) SSP1; C) SSP3.

**Table S1:** After Perkins et al., (2024). Agent functional types (AFTs) used in the WHAM! model of human fire use and management. Non-extractive land uses primarily encompasses conservation and recreation. The state land manager favors fire exclusion, whilst the pyro-diverse conservationist prefers fire-inclusion on the landscape as a natural ecosystem process. For a more detailed description of anthropogenic fire regimes see Perkins et al., (2022). Key: SOSH = Subsistence oriented smallholder, MOSH = Market-oriented smallholder.

| Anthropogenic fire regime | Land use system    |                               |                               |                                  |
|---------------------------|--------------------|-------------------------------|-------------------------------|----------------------------------|
|                           | Cropland           | Livestock                     | Forestry                      | Non-extractive                   |
| Pre-industrial            | Swidden            | Pastoralist                   | Hunter-gatherer               | Unoccupied                       |
| Transition                | SOSH, MOSH         | Extensive livestock farmer    | Logger, Agroforestry          | Recreationalist, Conservationist |
| Industrial                | Intensive farmer   | Intensive livestock farmer    | Managed forestry              | State land manager               |
| Post-industrial           | Abandoned cropland | Abandoned pasture / rangeland | Abandoned forestry plantation | Conservationist, Recreationalist |

## References

- Perkins, O., Kasoar, M., Voulgarakis, A., Smith, C., Mistry, J., Millington, J.D.A., 2024. A global behavioural model of human fire use and management: WHAM! v1.0. *Geoscientific Model Development* 17, 3993–4016. <https://doi.org/10.5194/gmd-17-3993-2024>
- Perkins, O., Matej, S., Erb, K., Millington, J., 2022. Towards a global behavioural model of anthropogenic fire: The spatiotemporal distribution of land-fire systems. *Socio-Environmental Systems Modelling* 4, 18130–18130. <https://doi.org/10.18174/sesmo.18130>
